# Supplementary material for: Contribution of Asian emissions to upper tropospheric CO over the remote Pacific
Source: Copernicus journal article supplement (doi:10.5194/acp-22-7193-2022), 2022-06-03
Supplement: Supplementary file 1 [file acp-22-7193-2022-supplement.pdf]

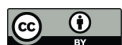

*Supplement of*

## **Contribution of Asian emissions to upper tropospheric CO over the remote Pacific**

**Linda Smoydzin and Peter Hoor**

*Correspondence to:* Linda Smoydzin (smoydzin@uni-mainz.de)

The copyright of individual parts of the supplement might differ from the article licence.

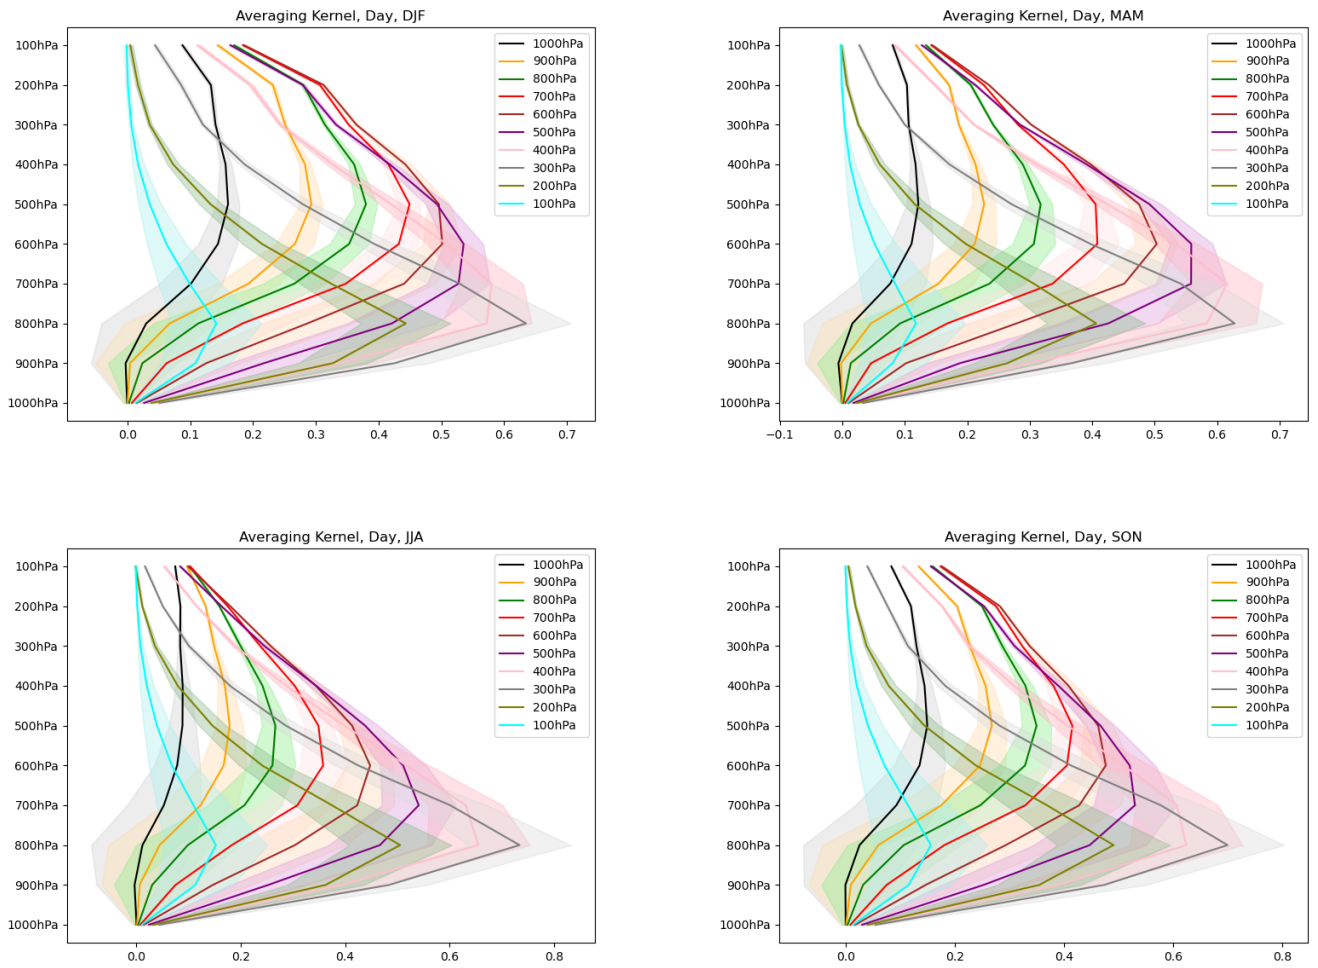

Figure 1: Daytime averaging Kernels average over the study region (see Fig. 3 in the manuscript) and averaged over the study period (2000-2019). Shaded areas show the standard deviation for each vertical layer.

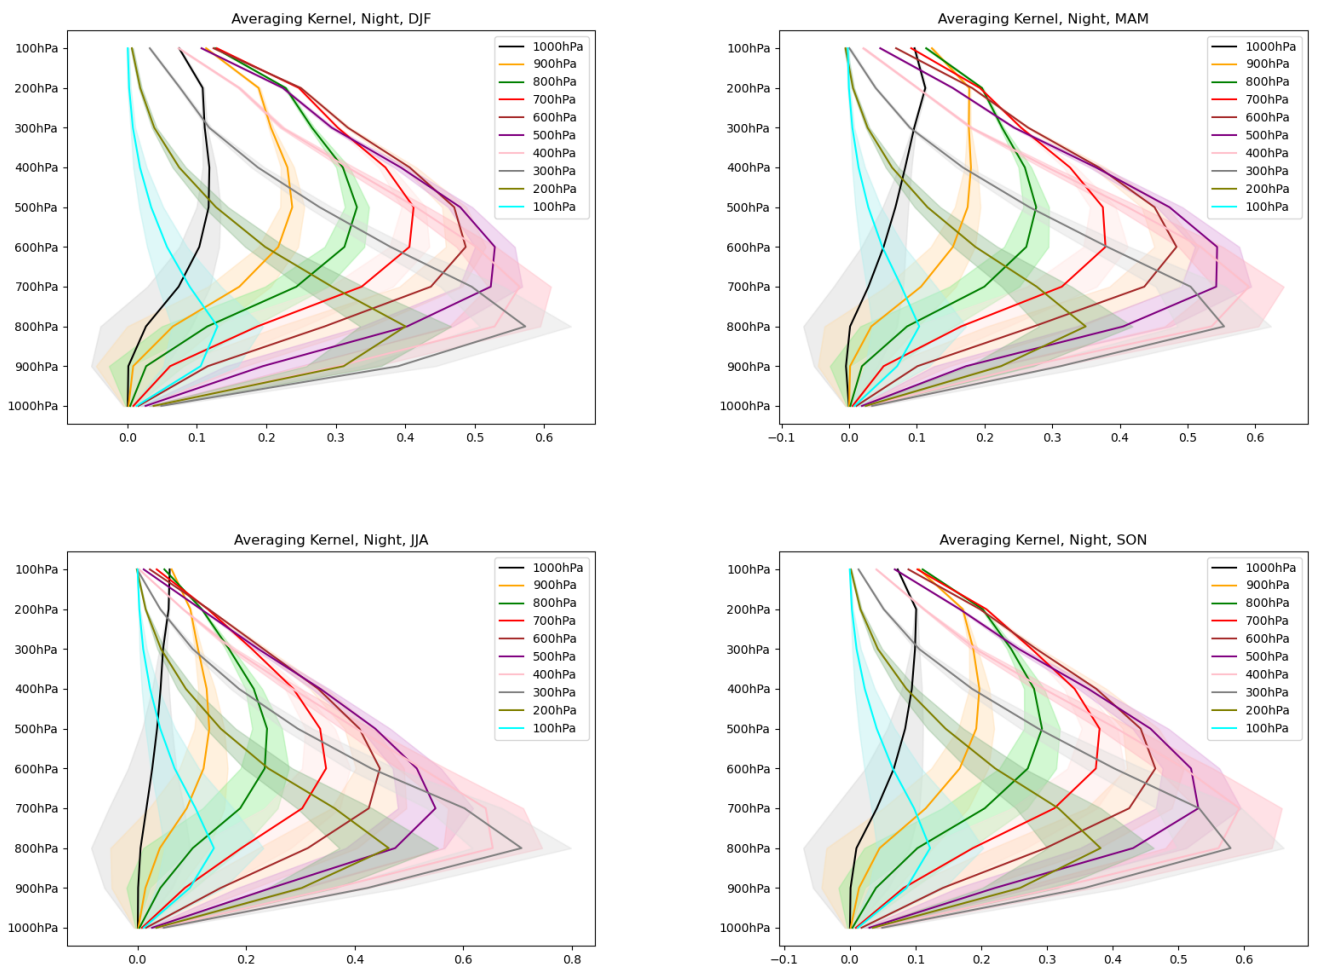

Figure 2: Nighttime averaging Kernels average over the study region (see Fig. 3 in the manuscript) and averaged over the study period (2000-2019). Shaded areas show the standard deviation for each vertical layer.
